# Supplementary material
Source: PubMed Central journal article supplement (PMC5429978)

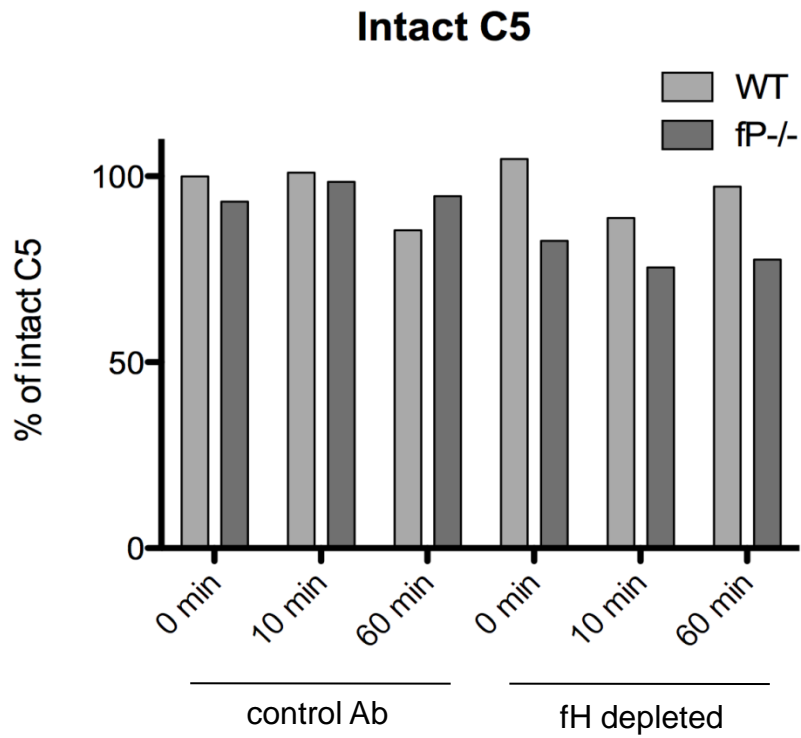

Supplement: NIHMS838368-supplement-1.pdf [file NIHMS838368-supplement-1.pdf]

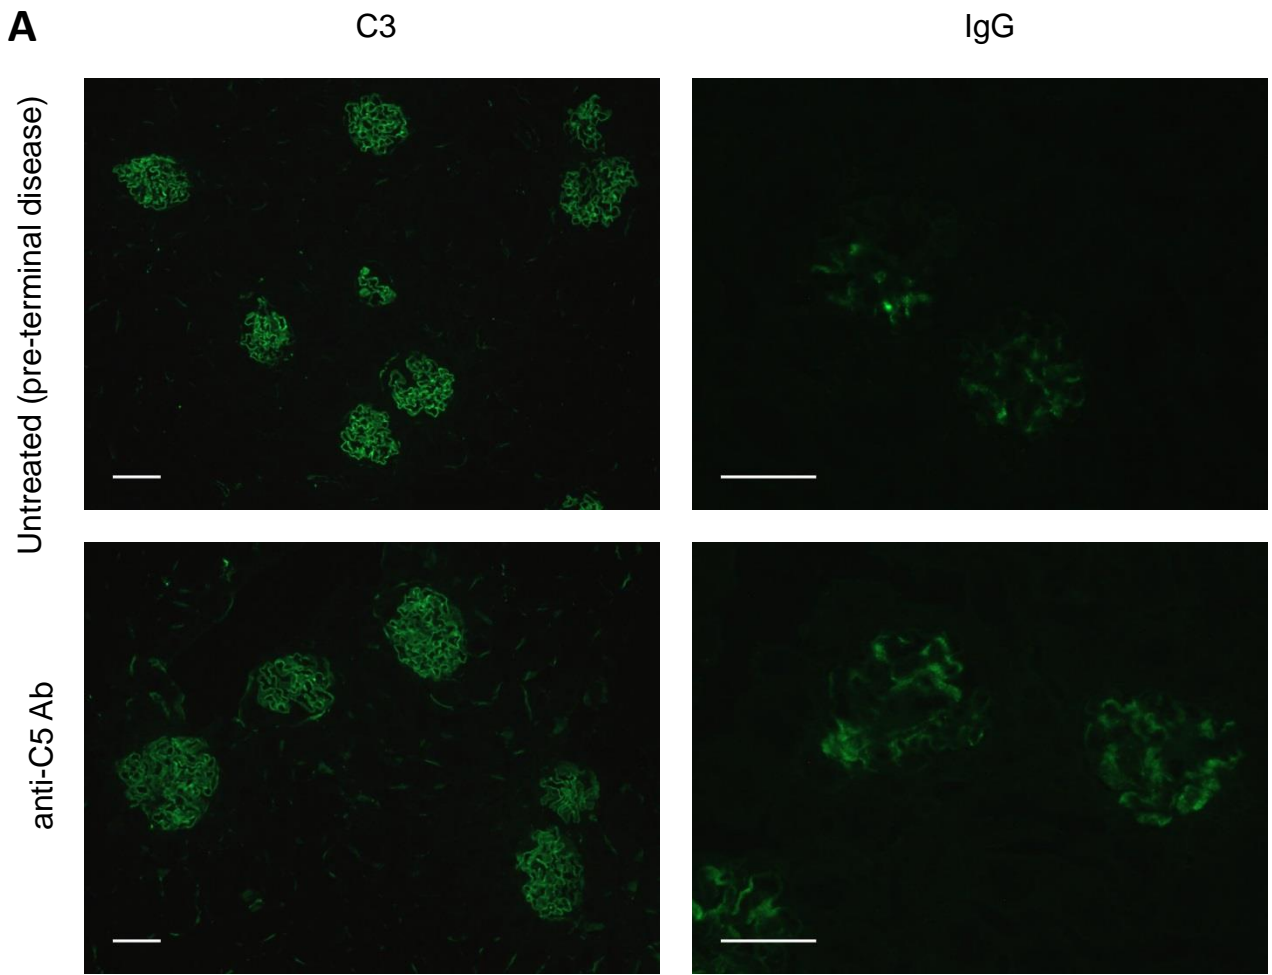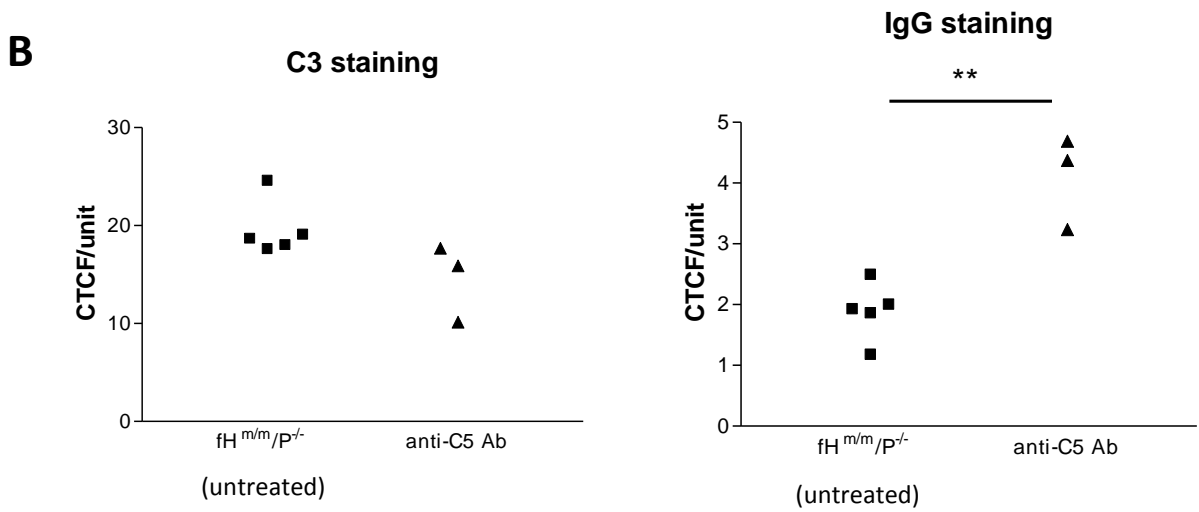

Supplement: NIHMS838368-supplement-2.pdf [file NIHMS838368-supplement-2.pdf]

C5aR<sup>-/-</sup>

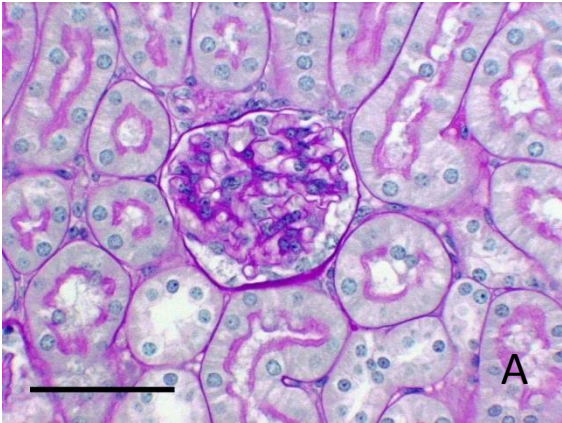

fH<sup>m/m</sup>/C5aR<sup>-/-</sup>

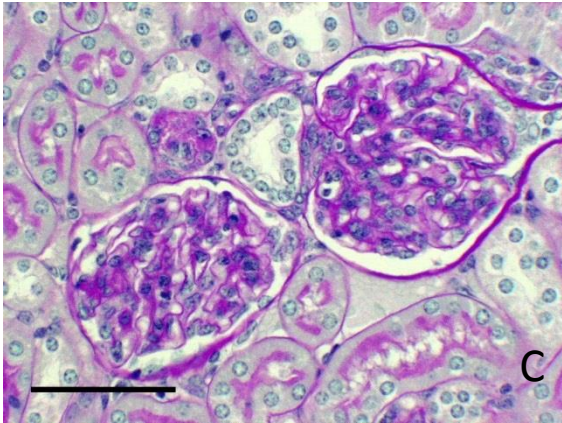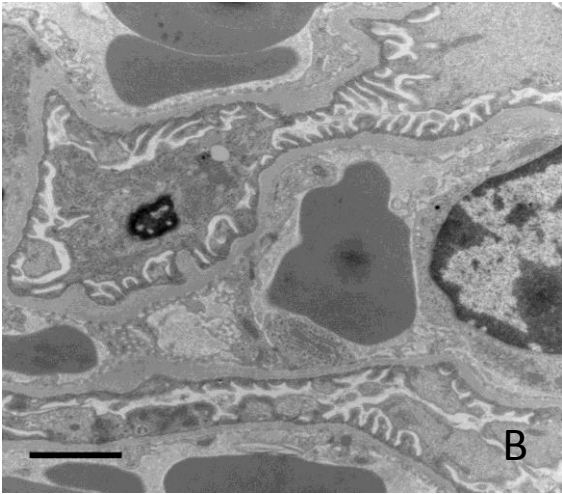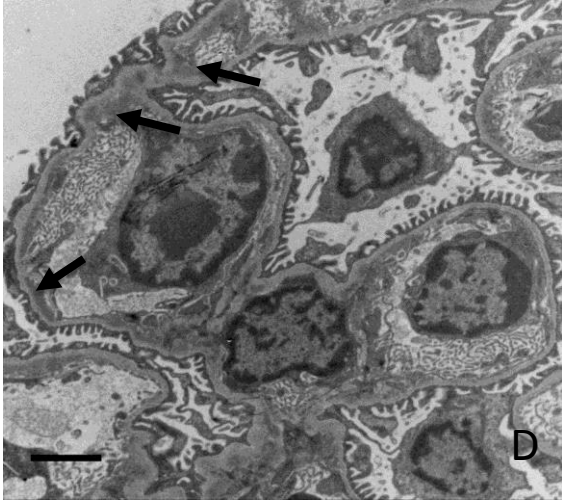

Supplement: NIHMS838368-supplement-4.pdf [file NIHMS838368-supplement-4.pdf]

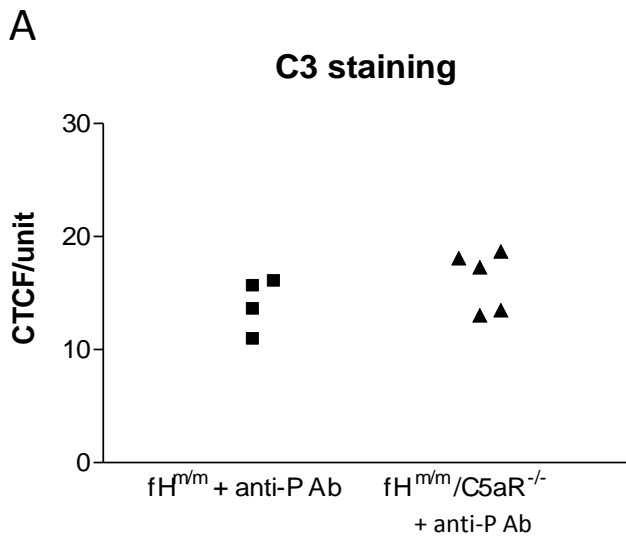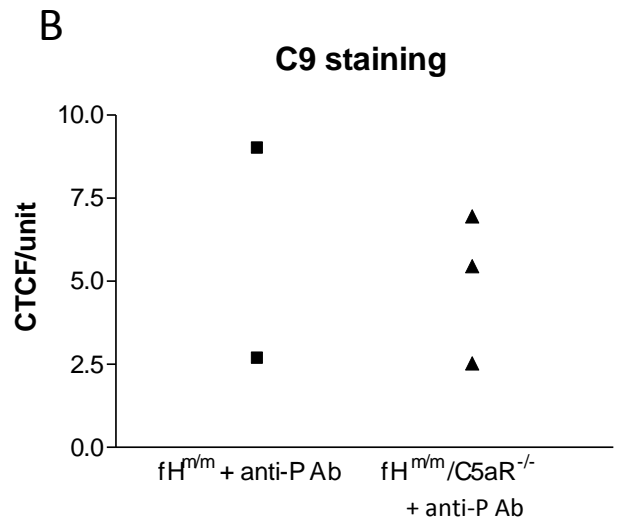

Supplement: NIHMS838368-supplement-6.pdf [file NIHMS838368-supplement-6.pdf]
